# Supplementary material for: Who can we reach and who can we keep? Predictors of intervention engagement and adherence in a cluster randomized controlled trial in South Africa
Source: Springer Nature journal article supplement (doi:10.1186/s12889-020-8357-x), 2020-02-27
Supplement: MOESM1 [file 17748558]

Entry Date

|     |     |     |    |      |
|-----|-----|-----|----|------|
| 1   | 2   | 3   | 4  | <NA> |
| 278 | 184 | 181 | 91 | 0    |

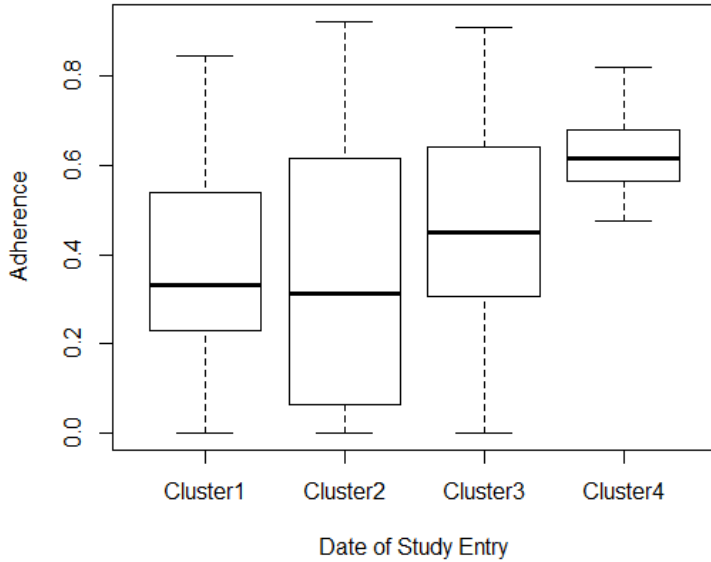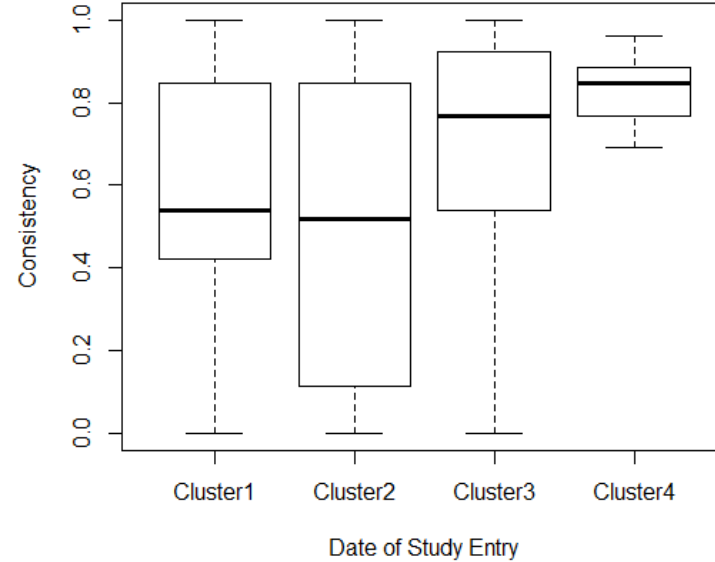

```
> cor(soc$adherence, soc$mstart, use = "complete.obs")
[1] 0.2303321
```

```
> cor(soc$consistency, soc$mstart, use = "complete.obs")
[1] 0.1803395
```

```
lm(formula = adherence ~ factor(mstart), data = soc)
```

```
lm(formula = consistency ~ factor(mstart), data = soc)
```

Residuals:

| Min      | 1Q       | Median   | 3Q      | Max     |
|----------|----------|----------|---------|---------|
| -0.46168 | -0.17495 | -0.02579 | 0.17120 | 0.56868 |

Residuals:

| Min      | 1Q       | Median  | 3Q      | Max     |
|----------|----------|---------|---------|---------|
| -0.69665 | -0.22126 | 0.00819 | 0.23896 | 0.50951 |

Coefficients:

|                 | Estimate | Std. Error | t value | Pr(> t )     |
|-----------------|----------|------------|---------|--------------|
| (Intercept)     | 0.38008  | 0.01404    | 27.075  | < 2e-16      |
| factor(mstart)2 | -0.02568 | 0.02229    | -1.152  | 0.249684     |
| factor(mstart)3 | 0.08160  | 0.02248    | 3.630   | 0.000305 *** |
| factor(mstart)4 | 0.24528  | 0.03755    | 6.532   | 1.28e-10 *** |

Coefficients:

|                 | Estimate | Std. Error | t value | Pr(> t )     |
|-----------------|----------|------------|---------|--------------|
| (Intercept)     | 0.60719  | 0.01718    | 35.350  | < 2e-16      |
| factor(mstart)2 | -0.11670 | 0.02728    | -4.278  | 2.15e-05 *** |
| factor(mstart)3 | 0.08946  | 0.02751    | 3.252   | 0.0012 **    |
| factor(mstart)4 | 0.21845  | 0.04595    | 4.754   | 2.43e-06 *** |

**Marital status**

```
> table(soc$Marital_status, useNA="always")
```

```
  0   1 <NA>
689  45   0
```

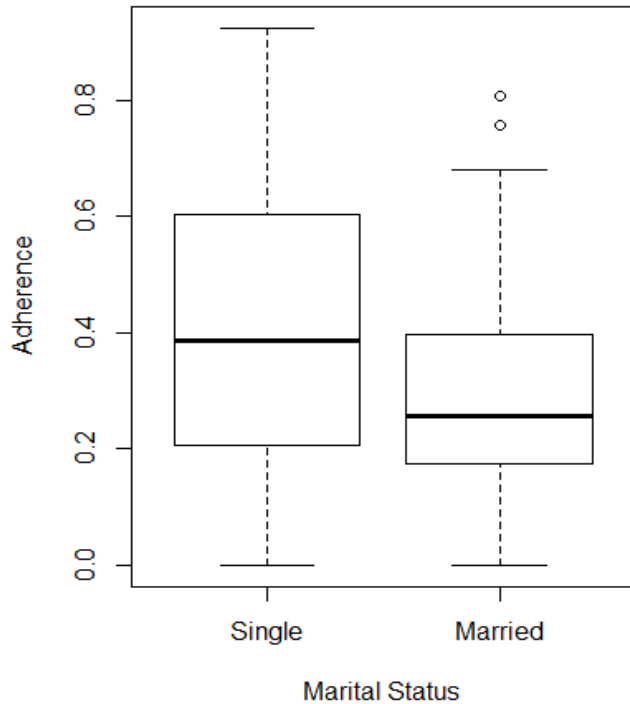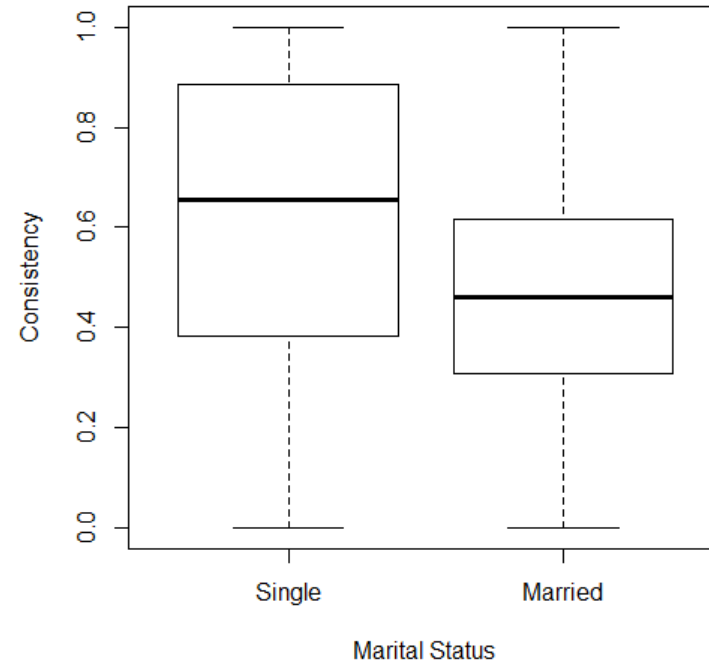

```
> cor(soc$adherence, soc$Marital_status, use="complete.obs")
[1] -0.09719881
```

sample estimates:  
 mean in group 0 mean in group 1  
 0.4166968 0.3183761

```
lm(formula = adherence ~ factor(Marital_status) + factor(mstart),
    data = soc)
```

Residuals:  
 Min 1Q Median 3Q Max  
 -0.46362 -0.16875 -0.02672 0.16458 0.56303

Coefficients:  
 (Intercept) Estimate Std. Error t value Pr(>|t|)  
 factor(Marital\_status)1 -0.08577 0.03729 -2.300 0.021753 \*

```
> cor(soc$consistency, soc$Marital_status)
[1] -0.1002459
```

sample estimates:  
 mean in group 0 mean in group 1  
 0.6214036 0.4963370

```
lm(formula = consistency ~ factor(Marital_status) + factor(mstart),
    data = soc)
```

Residuals:  
 Min 1Q Median 3Q Max  
 -0.69913 -0.19320 0.00229 0.22988 0.50229

Coefficients:  
 (Intercept) Estimate Std. Error t value Pr(>|t|)  
 (Marital\_status)1 -0.10943 0.04561 -2.399 0.01670 \*

## Education

| Min. | 1st Qu. | Median | Mean  | 3rd Qu. | Max.  | NA's |
|------|---------|--------|-------|---------|-------|------|
| 2.00 | 10.00   | 11.00  | 10.42 | 12.00   | 12.00 | 1    |

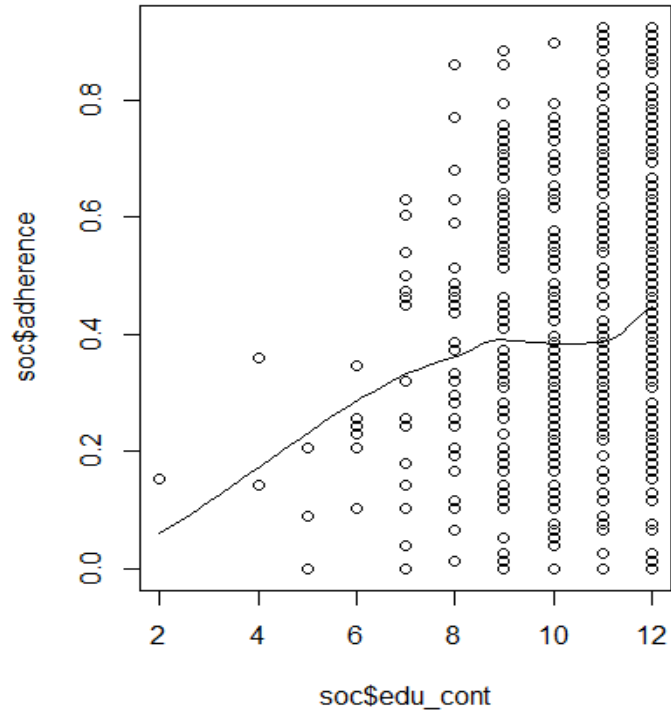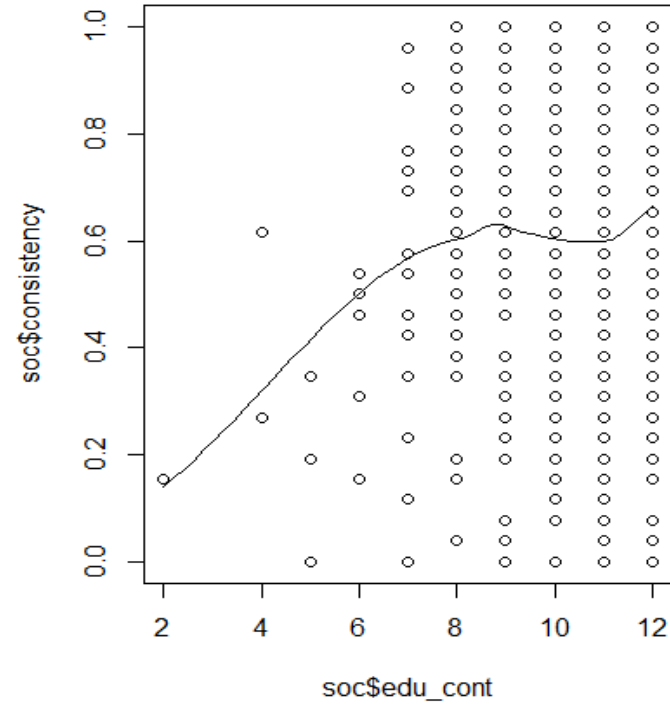

```
> cor(soc$adherence, soc$edu_cont, use="complete.obs")
[1] 0.163376
```

```
> cor(soc$consistency, soc$edu_cont, use="complete.obs")
[1] 0.1231079
```

```
lm(formula = adherence ~ edu_cont + factor(mstart), data = soc)
```

```
lm(formula = consistency ~ edu_cont + factor(mstart), data = soc)
```

Residuals:

| Min      | 1Q       | Median   | 3Q      | Max     |
|----------|----------|----------|---------|---------|
| -0.49426 | -0.17375 | -0.02599 | 0.17559 | 0.56227 |

Residuals:

| Min      | 1Q       | Median  | 3Q      | Max     |
|----------|----------|---------|---------|---------|
| -0.72771 | -0.20100 | 0.01534 | 0.23948 | 0.54372 |

Coefficients:

|             | Estimate | Std. Error | t value | Pr(> t )     |
|-------------|----------|------------|---------|--------------|
| (Intercept) | 0.154773 | 0.060115   | 2.575   | 0.010247     |
| edu_cont    | 0.022092 | 0.005735   | 3.852   | 0.000128 *** |

Coefficients:

|             | Estimate | Std. Error | t value | Pr(> t )   |
|-------------|----------|------------|---------|------------|
| (Intercept) | 0.392389 | 0.073873   | 5.312   | 1.48e-07   |
| edu_cont    | 0.021062 | 0.007047   | 2.989   | 0.00290 ** |

## Living with Partners

```
> table(soc$Partner.living.with.you2, useNA="always")
```

```
 1    2 <NA>
45  592  97
```

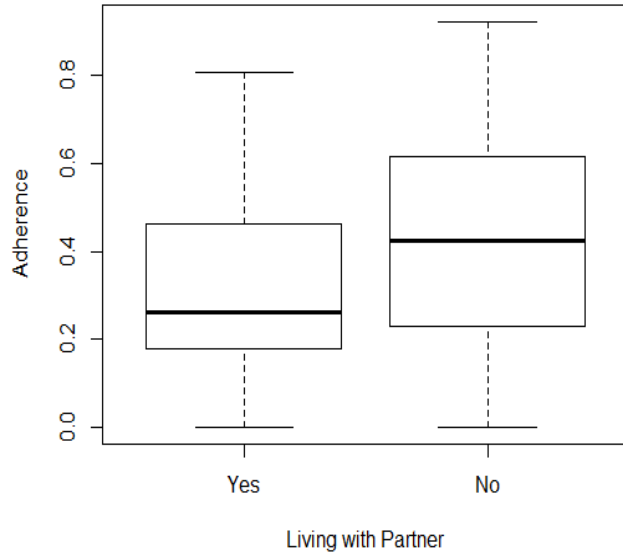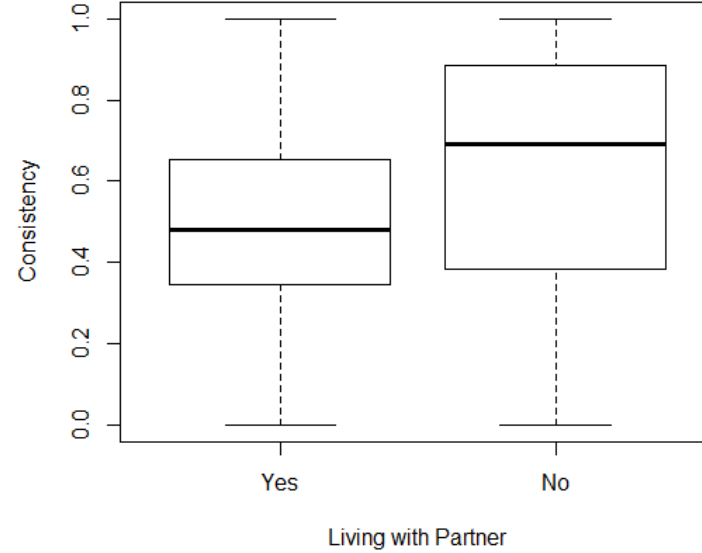

```
> cor(soc$adherence, soc$Partner.living.with.you)
[1] 0.1007577
```

sample estimates:

```
mean in group 1 mean in group 2
0.3183761      0.4131340
```

```
lm(formula = adherence ~ factor(Partner.living.with.you3)
+ factor(mstart), data = soc)
```

Residuals:

```
   Min       1Q   Median       3Q      Max
-0.46174 -0.16563 -0.02584  0.16646  0.57956
```

Coefficients:

```
            Estimate Std. Error t value Pr(>|t|)
(Intercept)    0.30719    0.03652   8.411 3.11e-16
(Partner.living3) 0.08177    0.03693   2.214  0.02719*
```

```
> cor(soc$consistency, soc$Partner.living.with.you)
[1] 0.1002595
```

sample estimates:

```
mean in group 1 mean in group 2
0.4963370      0.6187535
```

```
lm(formula = consistency ~ factor(Partner.living.with.you3)
+ factor(mstart), data = soc)
```

Residuals:

```
   Min       1Q   Median       3Q      Max
-0.69911 -0.19644  0.01499  0.22664  0.52217
```

Coefficients:

```
            Estimate Std. Error t value Pr(>|t|)
(Intercept)    0.51434    0.04490  11.456 < 2e-16
(Partner.living3) 0.10518    0.04540   2.317  0.02086*
```

**Formal housing**

```
> table(soc$Housing.description, useNA="always")
```

```
 1    2 <NA>
336 195 203
```

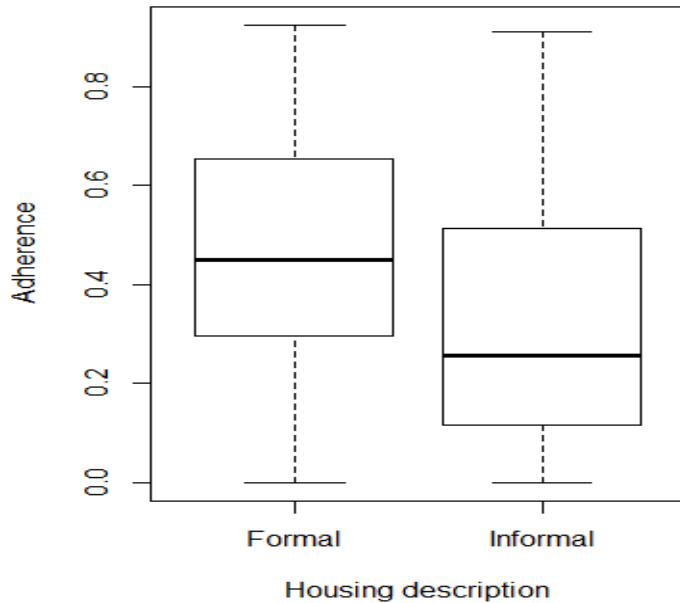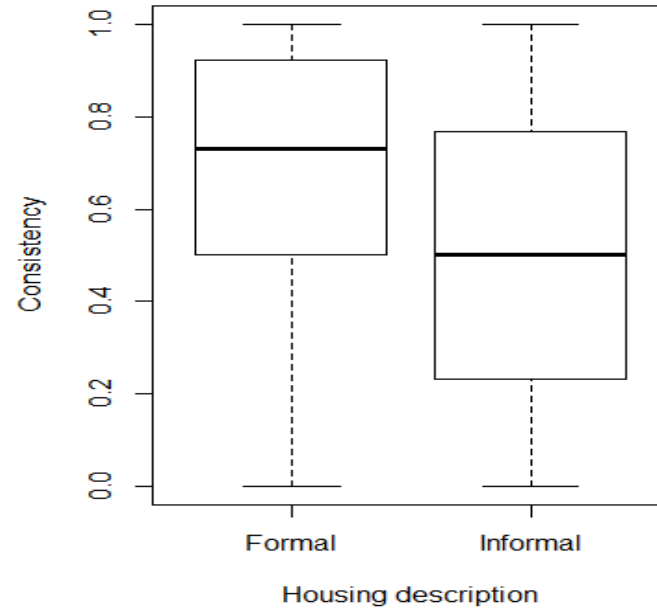

```
> cor(soc$adherence, soc$Housing.description)
[1] -0.2787248
```

sample estimates:

```
mean in group 1 mean in group 2
0.4767927      0.3348045
```

```
lm(formula = adherence ~ factor(Housing.description)
+ factor(mstart), data = soc)
```

Residuals:

```
Min      1Q  Median      3Q      Max
-0.47810 -0.16439 -0.01968  0.17418  0.57026
```

Coefficients:

```
                Estimate Std. Error t value Pr(>|t|)
(Intercept)      0.42080    0.02234  18.833 < 2e-16
(Housing.description)2 -0.12107    0.02384  -5.078 5.49e-07***
```

```
> cor(soc$consistency, soc$Housing.description)
[1] -0.2858479
```

sample estimates:

```
mean in group 1 mean in group 2
0.6956975      0.5161833
```

```
lm(formula = consistency ~ factor(Housing.description) +
factor(mstart), data = soc)
```

Residuals:

```
Min      1Q  Median      3Q      Max
-0.71454 -0.18925  0.01623  0.23382  0.55642
```

Coefficients:

```
                Estimate Std. Error t value Pr(>|t|)
(Intercept)      0.65079    0.02762  23.561 < 2e-16
(Housing)2       -0.13191    0.02947  -4.475 9.57e-06***
```

## Water Source

```
> table(soc$Water.source)
```

```
 1   2   3 <NA>
286 133 112 203
```

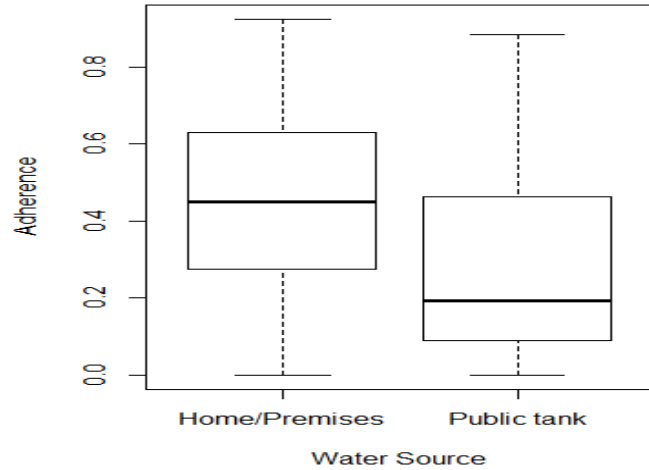

```
> cor(soc$adherence, soc$Water.source2)
[1] -0.3180569
```

sample estimates:

```
mean in group 1 mean in group 2
 0.4645530      0.2781339
```

```
lm(formula = adherence ~ factor(Water.source2) + factor(mstart),
    data = soc)
```

Residuals:

```
  Min       1Q   Median       3Q      Max
-0.46650 -0.15365 -0.02412  0.17261  0.60264
```

Coefficients:

```
            Estimate Std. Error t value Pr(>|t|)
(Intercept)    0.41006    0.02138   19.180 < 2e-16
factor(Water.source2) 2 -0.14204    0.02823   -5.031 6.96e-07***
```

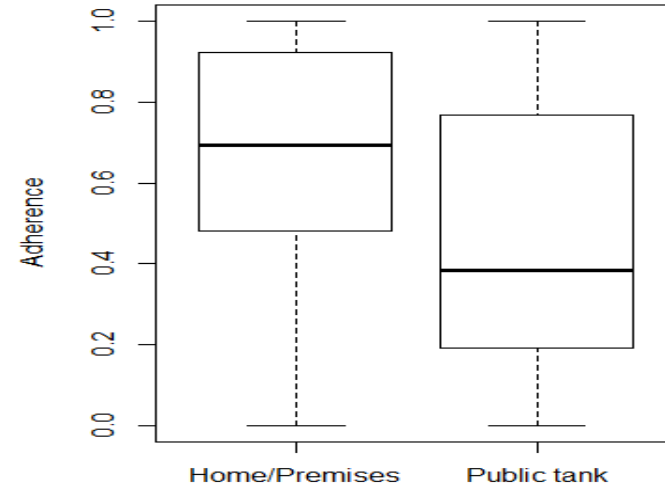

```
> cor(soc$consistency, soc$Water.source2)
[1] -0.3303797
```

sample estimates:

```
mean in group 1 mean in group 2
 0.6800416      0.4451567
```

```
lm(formula = consistency ~ factor(Water.source2) + fact
or(mstart), data = soc)
```

Residuals:

```
  Min       1Q   Median       3Q      Max
-0.70216 -0.17157  0.02051  0.24098  0.59568
```

Coefficients:

```
            Estimate Std. Error t value Pr(>|t|)
(Intercept)    0.64165    0.02637   24.332 < 2e-16
(Water.source2) 2 -0.16238    0.03483   -4.663 4.07e-06***
```

## Toilet

```
> table(soc$Water.source)
```

```
 1    2    3 <NA>
286 133 112 203
```

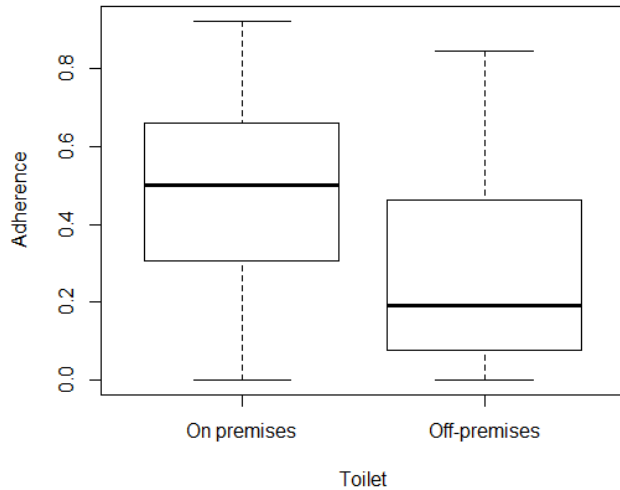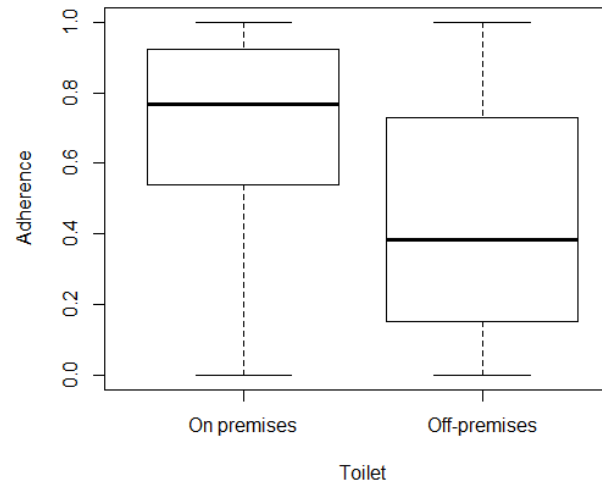

```
> cor(soc$adherence, soc$Water.source2)
[1] -0.3180569
```

```
sample estimates:
mean in group 1 mean in group 2
 0.4645530      0.2781339
```

```
lm(formula = adherence ~ factor(Household.toilet2) +
factor(mstart), data = soc)
```

```
Residuals:
    Min       1Q   Median       3Q      Max
-0.46736 -0.15883 -0.02279  0.17322  0.56999
```

```
Coefficients:
            Estimate Std. Error t value Pr(>|t|)
(Intercept)    0.42557    0.02161   19.689 < 2e-16
(Household.toilet2)2 -0.16734    0.02756  -6.073 2.58e-09***
```

```
> cor(soc$consistency, soc$Water.source2)
[1] -0.3303797
```

```
sample estimates:
mean in group 1 mean in group 2
 0.6800416      0.4451567
```

```
lm(formula = consistency ~ factor(Household.toilet2) +
factor(mstart), data = soc)
```

```
Residuals:
    Min       1Q   Median       3Q      Max
-0.70289 -0.16496  0.02051  0.22254  0.59880
```

```
Coefficients:
            Estimate Std. Error t value Pr(>|t|)
(Intercept)    0.65661    0.02677   24.526 < 2e-16
(Toilet2)2    -0.18396    0.03413  -5.390 1.11e-07***
```

## Chronic Illness

| TB | Alcoholism | HIV | <NA> |
|----|------------|-----|------|
| 29 | 111        | 25  | 569  |

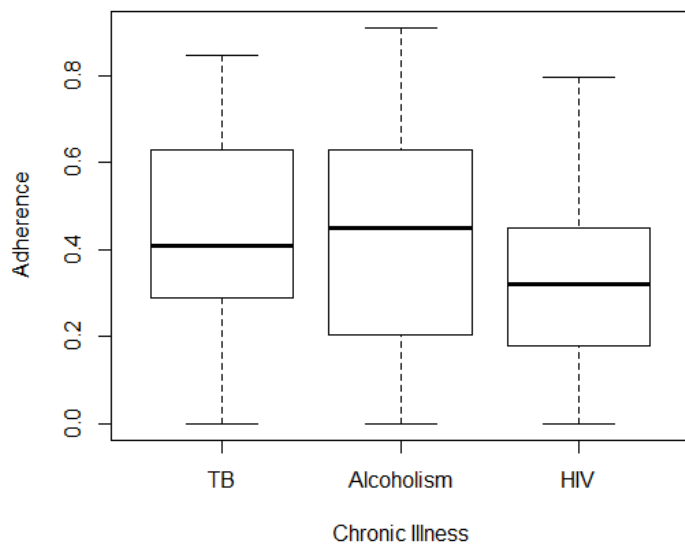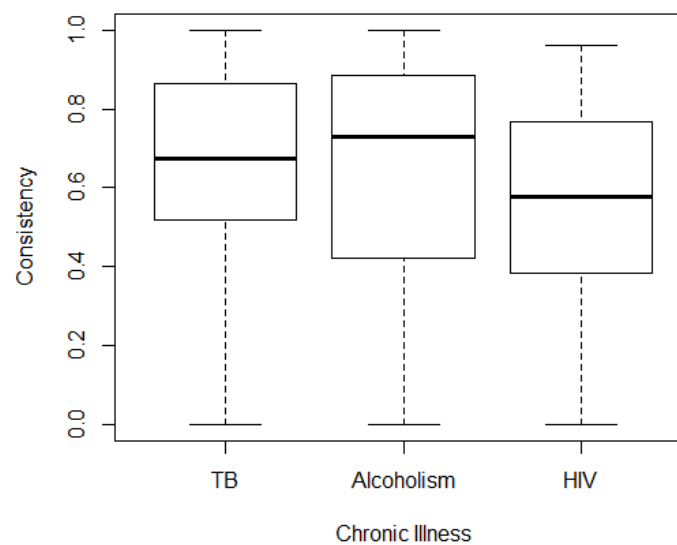

```
> cor(soc$adherence, soc$Chronic.illness)
[1] -0.09029262
```

```
lm(formula = adherence ~ factor(Chronic.illness) + fac
tor(mstart), data = soc)
```

Residuals:

| Min      | 1Q       | Median   | 3Q      | Max     |
|----------|----------|----------|---------|---------|
| -0.48646 | -0.17572 | -0.03592 | 0.16845 | 0.59450 |

Coefficients:

|                    | Estimate | Std. Error | t value | Pr(> t ) |
|--------------------|----------|------------|---------|----------|
| (Intercept)        | 0.45941  | 0.05028    | 9.137   | 4.55e-16 |
| (Chronic.illness)2 | -0.04069 | 0.04892    | -0.832  | 0.40682  |
| (Chronic.illness)3 | -0.12964 | 0.06669    | -1.944  | 0.05380  |

```
> cor(soc$consistency, soc$Chronic.illness)
[1] -0.06371669
```

```
lm(formula = consistency ~ factor(Chronic.illness) + fac
tor(mstart), data = soc)
```

Residuals:

| Min      | 1Q       | Median   | 3Q      | Max     |
|----------|----------|----------|---------|---------|
| -0.73358 | -0.18199 | -0.00011 | 0.22796 | 0.60061 |

Coefficients:

|                    | Estimate | Std. Error | t value | Pr(> t ) |
|--------------------|----------|------------|---------|----------|
| (Intercept)        | 0.70201  | 0.06101    | 11.506  | < 2e-16  |
| (Chronic.illness)2 | -0.03307 | 0.05936    | -0.557  | 0.578244 |
| (Chronic.illness)3 | -0.13540 | 0.08092    | -1.673  | 0.096388 |



## Gang Memberships

```
1 2 <NA>
168 566 0
```

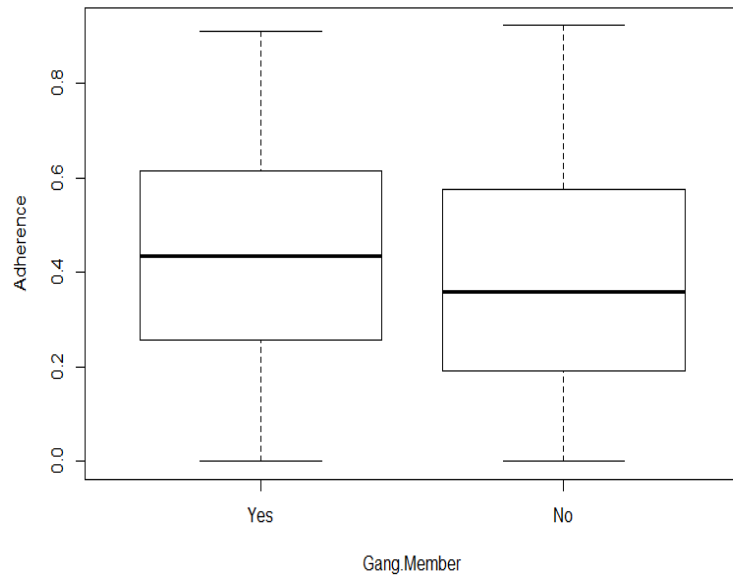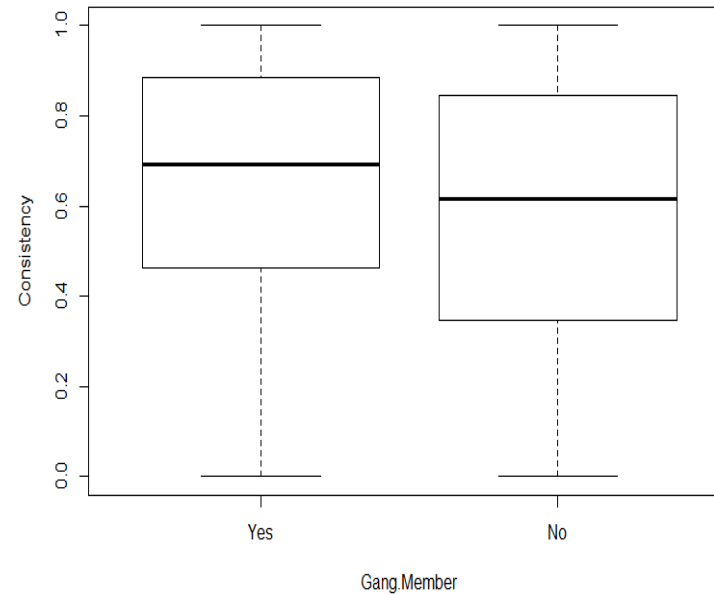

```
> cor(soc$adherence, soc$Gang.Member)
[1] -0.06553047
```

```
sample estimates:
mean in group 1 mean in group 2
0.4395259      0.4018322
```

```
lm(formula = adherence ~ factor(Gang.Member) + factor(mstart),
    data = soc)
```

```
Residuals:
    Min       1Q   Median       3Q      Max
-0.49228 -0.16759 -0.02656  0.16756  0.57782
```

```
Coefficients:
            Estimate Std. Error t value Pr(>|t|)
(Intercept)    0.41271    0.02144   19.246 < 2e-16
factor(Gang.Member)2 -0.04264    0.02122   -2.010 0.044865*
```

```
> cor(soc$consistency, soc$Gang.Member)
[1] -0.08273959
```

```
sample estimates:
mean in group 1 mean in group 2
0.6586841      0.5999853
```

```
lm(formula = consistency ~ factor(Gang.Member) + factor(mstart),
    data = soc)
```

```
Residuals:
    Min       1Q   Median       3Q      Max
-0.73929 -0.20863  0.01244  0.23194  0.52224
```

```
Coefficients:
            Estimate Std. Error t value Pr(>|t|)
(Intercept)    0.65267    0.02622   24.896 < 2e-16
factor(Gang.Member)2 -0.05943    0.02594   -2.291 0.02227*
```

## Aggregate Gangsterism

| Min.  | 1st Qu. | Median | Mean  | 3rd Qu. | Max.  | NA's |
|-------|---------|--------|-------|---------|-------|------|
| 1.000 | 1.000   | 1.000  | 2.494 | 4.000   | 6.000 | 459  |

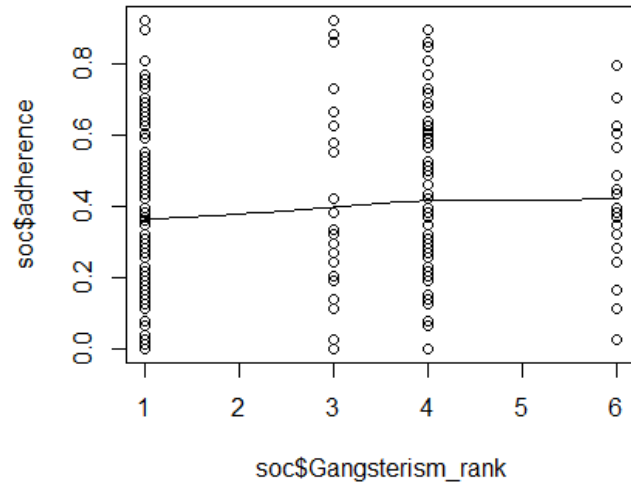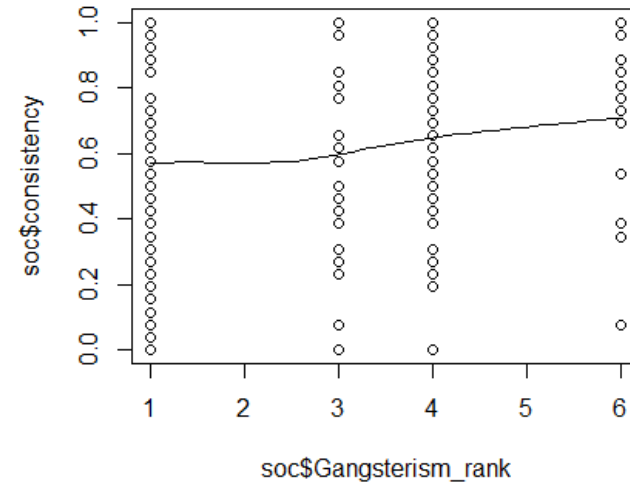

```
> cor(soc$adherence, soc$Gangsterism_rank)
[1] 0.07188372
```

```
lm(formula = adherence ~ Gangsterism_rank, data = soc)
```

Residuals:

| Min      | 1Q       | Median   | 3Q      | Max     |
|----------|----------|----------|---------|---------|
| -0.42513 | -0.17803 | -0.01778 | 0.17831 | 0.52709 |

Coefficients:

|                  | Estimate | Std. Error | t value | Pr(> t ) |
|------------------|----------|------------|---------|----------|
| (Intercept)      | 0.386265 | 0.025611   | 15.082  | <2e-16   |
| Gangsterism_rank | 0.009717 | 0.008460   | 1.149   | 0.252    |

```
> cor(soc$consistency, soc$Gangsterism_rank)
[1] 0.1319719
```

```
lm(formula = consistency ~ Gangsterism_rank + factor(mstart),
    data = soc)
```

Residuals:

| Min     | 1Q      | Median  | 3Q     | Max    |
|---------|---------|---------|--------|--------|
| -0.6305 | -0.1802 | -0.0145 | 0.2204 | 0.5610 |

Coefficients:

|                  | Estimate | Std. Error | t value | Pr(> t )   |
|------------------|----------|------------|---------|------------|
| (Intercept)      | 0.566399 | 0.035393   | 16.003  | < 2e-16    |
| Gangsterism_rank | 0.023497 | 0.009857   | 2.384   | 0.017884 * |
